# Supplementary material for: Carotid endarterectomy with patch angioplasty versus primary closure in patients with symptomatic and significant stenosis: a systematic review with meta-analyses and trial sequential analysis of randomized clinical trials
Source: PubMed Central journal article supplement (PMC8103619; doi:10.1186/s13643-021-01692-8), 2021-05-06
Supplement: 13643_2021_1692_MOESM1_ESM.pdf [file 13643_2021_1692_MOESM1_ESM.pdf]

## Supplementary file I Searches

### Primary search.

#### Search PubMed 13<sup>th</sup> June 2019

("Endarterectomy, Carotid"[Mesh] OR "Carotid Stenosis"[Mesh] OR "Stents"[Mesh] OR (Carotid[tiab] AND Endarterectomy[tiab]) OR (eversion[tiab] AND endarterectomy[tiab] OR (eversion[tiab] AND CEA[tiab]) OR eCEA[tiab] OR Carotid Stenos\*[tiab] OR (carotid[tiab] AND Stent\*[tiab]) OR (carotid[tiab] AND surger\*[tiab])) AND ("Blood Vessel Prosthesis"[Mesh] OR "Polyethylene Terephthalates"[Mesh] OR "Polytetrafluoroethylene"[Mesh] OR Polytef[tiab] OR PTFE[tiab] OR TFE[tiab] OR FEP[tiab] OR Tarflen[tiab] OR Fluoroplast[tiab] OR GORE-TEX[tiab] OR Goretex[tiab] OR Teflon[tiab] OR Fluon[tiab] OR Polyethylene Terephthalate[tiab] OR Dacron[tiab] OR Polytetrafluoroethylene[tiab] OR Patch\*[tiab] OR Blood Vessel Prosthes\*[tiab] OR Vascular Prosthes\*[tiab] OR Tissue-Engineered Vascular Graft\*[tiab] OR "Angioplasty"[Mesh] OR angioplast\*[tiab] OR biopatch\*[tiab] OR porcine[tiab] OR bovine[tiab] OR "Endarterectomy, Carotid"[Mesh] OR (carotid[tiab] AND endarterectomy[tiab]) OR cCEA[tiab]))

42462 hits

#### Search EMBASE 13<sup>th</sup> June 2019

('carotid endarterectomy'/exp OR 'carotid artery obstruction'/exp OR 'carotid artery stenting'/exp OR 'carotid artery stent'/exp OR (Carotid:ti,ab AND Endarterectomy:ti,ab) OR (eversion:ti,ab AND endarterectomy:ti,ab) OR (eversion:ti,ab AND CEA:ti,ab) OR 'Carotid Stenos\*':ti,ab OR (carotid:ti,ab AND Stent\*:ti,ab) OR (carotid:ti,ab AND surger\*:ti,ab)) AND ('blood vessel prosthesis'/exp OR 'polyethylene terephthalate'/exp OR 'polytetrafluoroethylene covered stent'/exp OR Polytef:ti,ab OR PTFE:ti,ab OR TFE:ti,ab OR FEP:ti,ab OR Tarflen:ti,ab OR Fluoroplast:ti,ab OR 'GORE-TEX':ti,ab OR Goretex:ti,ab OR Teflon:ti,ab OR Fluon:ti,ab OR 'Polyethylene Terephthalate':ti,ab OR Dacron:ti,ab OR Polytetrafluoroethylene:ti,ab OR Patch\*:ti,ab OR 'Blood Vessel Prosthes\*':ti,ab OR 'Vascular Prosthes\*':ti,ab OR 'Tissue-Engineered Vascular Graft\*':ti,ab OR 'angioplasty'/exp OR angioplast\*:ti,ab OR biopatch\*:ti,ab OR porcine:ti,ab OR bovine:ti,ab OR 'carotid endarterectomy'/exp OR (carotid:ti,ab AND endarterectomy:ti,ab) OR cCEA:ti,ab))

25898 hits

### **Search Cochrane 13<sup>th</sup> June 2019**

Carotid Endarterectomy OR eversion endarterectomy OR eversion CEA OR eCEA OR Carotid Stenos\* OR carotid Stent\* OR carotid surger\*

AND

Polytef OR PTFE OR TFE OR FEP OR Tarflen OR Fluoroplast OR GORE-TEX OR Goretex OR Teflon OR Fluon OR Polyethylene Terephthalate OR Dacron OR Polytetrafluoroethylene OR Patch\* OR Blood Vessel Prothes\* OR Vascular Prothes\* OR Tissue-Engineered Vascular Graft\* OR angioplast\* OR biopatch\* OR porcine OR bovine OR carotid endarterectomy OR cCEA

1453 hits

### **Search Google Scholar 13<sup>th</sup> June 2019**

Carotid Endarterectomy in title

1000 hits

### **Updated search.**

The primary search mentioned above was updated after expert suggestion on the 1<sup>st</sup> of June 2020 including the new outcome. There were not found any randomized clinical trials comparing patch versus primary closure in carotid endarterectomy.
